# Supplementary material for: Perihematomal Edema and Clinical Outcome in Intracerebral Hemorrhage Related to Different Oral Anticoagulants
Source: MDPI journal article supplement (doi:10.3390/jcm10112234), 2021-05-21
Supplement: s1 [file s1]

## Supplemental Material

**Supplementary Table 1:** Univariate analysis of predictors of poor outcome (modified Rankin Scale 4-6) in patients with oral anticoagulation associated intracerebral hemorrhage (OAC-ICH) at discharge.

| Predictor                         | Poor outcome (mRS 4-6) in OAC-ICH |             |                        |         |
|-----------------------------------|-----------------------------------|-------------|------------------------|---------|
|                                   | OR                                | 95% CI      | Regression-Coefficient | P-Value |
| Age [years]                       | 0.999                             | 0.967-1.032 | -0.001                 | 0.945   |
| Gender [ref: female]              | 1.112                             | 0.536-2.307 | 0.106                  | 0.776   |
| Hypertension [ref: yes]           | 0.587                             | 0.191-1.802 | -0.534                 | 0.351   |
| Diabetes mellitus [ref: yes]      | 0.70                              | 0.296-1.653 | -0.357                 | 0.416   |
| Anticoagulation                   | -                                 | -           | -                      | -       |
| Antiplatelet [ref: yes]           | 1.397                             | 0.450-4.341 | 0.334                  | 0.563   |
| symptom onset to imaging [hours]  | 0.992                             | 0.977-1.006 | -0.008                 | 0.258   |
| GCS on admission                  | 0.694                             | 0.568-0.848 | -0.365                 | <0.0001 |
| NIHSS on admission                | 1.125                             | 1.048-1.208 | 0.118                  | 0.036   |
| ICH Volume [mL]                   | 1.026                             | 1.011-1.042 | 0.026                  | 0.001   |
| PHE Volume [mL]                   | 1.018                             | 1.002-1.034 | 0.018                  | 0.024   |
| rPHE                              | 0.930                             | 0.766-1.129 | -0.072                 | 0.465   |
| EED [cm]                          | 1.031                             | 0.879-1.210 | 0.031                  | 0.709   |
| IVH [ref: yes]                    | 3.353                             | 1.502-7.484 | 1.21                   | 0.003   |
| Location (ref: supratentorial)    | 0.738                             | 0.355-1.534 | -0.304                 | 0.415   |
| Craniectomy [ref: supratentorial] | 1.977                             | 1.014-3.856 | 0.682                  | 0.045   |

*Legend:* ICH indicates intracerebral haemorrhage; IVH, intraventricular, GCS, Glasgow Come Scale; EED, edema extension distance; OAC-ICH, oral anticoagulation associated intracerebral hemorrhage; PHE, perihematoma edema; ref, reference; and rPHE, relative perihematoma edema.

**Supplementary Table 2:** Univariate analysis of predictors of poor outcome (modified Rankin Scale 4-6) in patients with non-oral anticoagulation associated intracerebral hemorrhage (NON-OAC-ICH) at discharge.

| Predictor                         | Poor outcome (mRS 4-6) in NON-OAC-ICH |             |                        |         |
|-----------------------------------|---------------------------------------|-------------|------------------------|---------|
|                                   | OR                                    | 95% CI      | Regression-Coefficient | P-Value |
| Age [years]                       | 1.007                                 | 0.994-1.021 | 0.007                  | 0.276   |
| Gender [ref: female]              | 0.906                                 | 0.603-1.361 | -0.099                 | 0.634   |
| Hypertension [ref: yes]           | 0.843                                 | 0.531-1.339 | -0.171                 | 0.469   |
| Diabetes mellitus [ref: yes]      | 1.346                                 | 0.711-2.547 | 0.297                  | 0.361   |
| Anticoagulation                   | -                                     | -           | -                      | -       |
| Antiplatelet [ref: yes]           | 0.956                                 | 0.61-1.498  | -0.045                 | 0.843   |
| symptom onset to imaging [hours]  | 1.0                                   | 0.999-1.002 | 0.000                  | 0.697   |
| GCS on admission                  | 0.766                                 | 0.712-0.824 | -0.267                 | <0.0001 |
| NIHSS on admission                | 1.128                                 | 1.086-1.172 | 0.121                  | <0.0001 |
| ICH Volume [mL]                   | 1.024                                 | 1.016-1.033 | 0.024                  | <0.0001 |
| PHE Volume [mL]                   | 1.023                                 | 1.014-1.032 | 0.023                  | <0.0001 |
| rPHE                              | 0.942                                 | 0.874-1.016 | -0.059                 | 0.122   |
| EED [cm]                          | 1.115                                 | 1.024-1.213 | 1.09                   | 0.012   |
| IVH [ref: yes]                    | 5.177                                 | 3.227-8.304 | 1.644                  | <0.0001 |
| Location (ref: supratentorial)    | 0.551                                 | 0.357-0.851 | -0.596                 | 0.007   |
| Craniectomy [ref: supratentorial] | 2.877                                 | 1.433-5.779 | 1.057                  | 0.003   |

*Legend:* ICH indicates intracerebral haemorrhage; IVH, intraventricular, GCS, Glasgow Come Scale; EED, edema extension distance; PHE, perihematoma edema; ref, reference; rPHE, relative perihematoma edema; and NON-OAC-ICH, non-oral anticoagulation related intracerebral hemorrhage.
